# Supplementary material for: Evaluating a knowledge exchange intervention in cancer survivorship care: a workshop to foster implementation of Online Support Groups
Source: Springer Nature journal article supplement (doi:10.1007/s00520-012-1686-2), 2012-12-28
Supplement: MOESM1 [file 8573490]

## Pre-Workshop Questionnaire

1. Please describe your role in relation to cancer care (*check all that apply*):
  - Clinician
  - Clinical Leader
  - Administrator / Manager
  - Researcher
  - Other: \_\_\_\_\_
  
2. How do you stay updated of current research in relation to Cancer Care? *Please rank according to most utilized method.*
  - Publications
  - Conferences
  - Continuing Education Sessions
  - Colleagues / word of mouth
  - Media – newspapers, newscasts, etc.
  - Other: \_\_\_\_\_
  
3. Generally speaking, is consulting the research evidence valued in your work place when making program and policy decisions?
  - Yes
  - No
  
4. Are you and your colleagues offered any type of support to access research evidence in everyday practice?
  - No
  - Yes (*check all that apply*):
    - Research assistance through an individual (i.e. librarian, educator, etc.)
    - Time off work to attend conferences, presentations, rounds, etc.
    - Encouraged to participate on research teams
    - Other: \_\_\_\_\_
  
5. Please describe your knowledge of the research evidence in relation to Online Support Groups.
  - Expert
  - Knowledgeable
  - Somewhat Knowledgeable
  - Limited knowledge
  - Unaware

6. Where do you access this information? *Please rank according to most utilized method.*
- N/A
  - Publications
  - Conferences
  - Colleagues / word of mouth
  - Media – newspapers, newscasts, etc.
  - Other: \_\_\_\_\_
7. Did you watch the slide show presentation that was sent to you via email in November 19, 2010?
- Yes
  - No
8. If yes, did you find it useful in (*Check all that apply*):
- Piquing your interest in OSG
  - Providing background information to what OSGs are all about
  - Disseminating research evidence related to OSG
  - Providing a reference to your colleagues
  - I did not find it useful
9. Did you read the manuscript *Facilitating Online Support Groups for cancer patients: the learning experience of psycho-oncology clinicians* that was sent to you via email on January 7, 2011?
- Yes
  - No
10. If yes, did you find it useful in (*Check all that apply*):
- Piquing your interest in OSG
  - Providing background information to what OSGs are all about
  - Disseminating research evidence related to OSG
  - Providing a reference to your colleagues
  - I did not find it useful
11. Did you read the draft manuscript *Program Evaluation of a National Initiative to Provide Professionally-Led Online Support Groups for People Affected by Cancer* that was sent to you via email on February 11, 2011?
- Yes
  - No

12. If yes, did you find it useful in *(Check all that apply)*:

- Piquing your interest in OSG
- Providing background information to what OSGs are all about
- Providing a reference to your colleagues
- Disseminating research evidence related to OSG
- I did not find it useful

13. Have you ever participated in one of the following Knowledge Exchange activities in relation to supportive cancer care? *(Check all that apply)*:

- Professional development activity
- Evidence Based Medicine workshop
- Educational seminar (such as clinical rounds, public lecture, etc.)
- Other: \_\_\_\_\_

14. Of these activities, which was the most effective activity for increasing your knowledge and understanding of the supportive cancer care topic or issue?

\_\_\_\_\_

15. What made it effective? Please check all that apply:

- Material presented was clear and concise
- Material presented was relevant to my position and decisions that I make
- Instructor was an expert
- Instructor was engaging
- Activity was interactive
- Other: \_\_\_\_\_

16. Please describe some of the challenges to effective knowledge transfer and exchange activities between clinicians and researchers:

\_\_\_\_\_  
\_\_\_\_\_  
\_\_\_\_\_  
\_\_\_\_\_
