# Supplementary material for: Evaluating a knowledge exchange intervention in cancer survivorship care: a workshop to foster implementation of Online Support Groups
Source: Springer Nature journal article supplement (doi:10.1007/s00520-012-1686-2), 2012-12-28
Supplement: MOESM2 [file 8573490]

**Post-questionnaire**

- 1. Was this workshop relevant to the decisions and scope of your work in supportive cancer care?
  - Yes
  - Partially related
  - No
  
- 2. The material was appropriate for the audience invited.
  - Yes
  - Somewhat
  - No
  
- 3. The focus of the workshop (material presented, the issues discussed) was what I expected.
  - Yes
  - Somewhat
  - No
  
- 4. My questions and concerns related to OSG were acknowledge and addressed during this workshop.
  - Yes
  - Somewhat
  - No
  
- 5. Did receiving material via email prior to attending the workshop (slide show presentation and manuscript) prepare you for this workshop?
  - Yes
  - Somewhat
  - No
  
- 6. Is there information that you could have received prior to the workshop that would have better prepared you for the meeting and encouraged your ability to participate?
  - No
  - Yes *Please give an example(s)*

---

---

---

7. How effective was this workshop in increasing your knowledge of:
- The research evidence related to online support groups (OSG)

|                |                    |               |     |
|----------------|--------------------|---------------|-----|
| Very effective | Somewhat effective | Not effective | N/A |
|----------------|--------------------|---------------|-----|
  - Current activity by the OSG National Steering Group

|                |                    |               |     |
|----------------|--------------------|---------------|-----|
| Very effective | Somewhat effective | Not effective | N/A |
|----------------|--------------------|---------------|-----|
  - The procedures and protocols designed to address ethical/risk management issues in OSGs

|                |                    |               |     |
|----------------|--------------------|---------------|-----|
| Very effective | Somewhat effective | Not effective | N/A |
|----------------|--------------------|---------------|-----|
  - The activities and role functions needed for implementation at a systems level

|                |                    |               |     |
|----------------|--------------------|---------------|-----|
| Very effective | Somewhat effective | Not effective | N/A |
|----------------|--------------------|---------------|-----|
  - The action required on your behalf to contribute to implementing OSG in your region

|                |                    |               |     |
|----------------|--------------------|---------------|-----|
| Very effective | Somewhat effective | Not effective | N/A |
|----------------|--------------------|---------------|-----|

8. What did you find beneficial about this workshop? *Check all that apply.*

- The opportunity to learn about OSG
- The opportunity to contribute my ideas
- The opportunity to converse and network with others in supportive cancer care
- The opportunity to create an action plan for how to implement OSG in my region
- Other:

---



---

9. Are OSGs an intervention that, in your opinion, would be supported by the institution that you work in?

- Yes
- No
- Unsure

10. If no, what do you foresee as being the issue(s) (*check all the apply*):

- Budgetary Restrictions
- Limited professional capacity to follow through
- Uncertainty regarding patient privacy and data security
- Uncertainty regarding effectiveness of OSG
- Other:

---



---

11. The most significant issue/topic covered today was:

---

---

---

---

12. The workshop could have been improved by:

---

---

---

---

13. Topics and issues related to OSG that I am still unclear about and require more information on:

---

---

---

---
