# Supplementary material for: Evaluating a knowledge exchange intervention in cancer survivorship care: a workshop to foster implementation of Online Support Groups
Source: Springer Nature journal article supplement (doi:10.1007/s00520-012-1686-2), 2012-12-28
Supplement: MOESM3 [file 8573490]

- 1. Since the workshop in Vancouver on February 25, 2011, have you had the opportunity to discuss Online Support Groups (OSGs) with colleagues?**
  - Yes
  - No
  
- 2. Based on the information presented at the workshop (experiential and research evidence), do you feel you have a good grasp of what OSGs are about?**
  - Yes
  - No
  
- 3. Do you feel that you could convey this knowledge to others you work with?**
  - Yes
  - No
  - Somewhat
  
- 4. Are there any other materials that you would find helpful in conveying this knowledge? *Check all that apply***
  - Short research brief summarizing findings into policy and program relevant messages (1 page)
  - Patient testimonials
  - Published, peer reviewed journal articles
  - Detailed outline of budgetary requirements to implement OSG
  - Other: \_\_\_\_\_
  
- 5. After attending the OSG workshop in Vancouver, did you return to your work place intending to find a way to implement OSG in your region?**
  - Yes - continue on
  - No - go to question 8
  
- 6. In your opinion, what supports currently exist in your region / at your institution that would assist in implementing OSG? *Check all that apply***
  - Moral support from colleagues and clinicians
  - Commitment to supportive cancer care programming
  - Resources are available
  - Patient need
  - Professional capacity for face to face groups is limited - this is an alternative
  - Need for services in rural areas is a priority – this is an option

**7. In your opinion, would any of the following strategies be useful in making the most of this support? Check all that apply**

- Short research brief summarizing findings into policy and program relevant messages (1 page)
- Face to face presentation and discussion by the OSG research team to decision makers
- Face to face presentation and discussion by clinicians who have implemented OSG in their region with clinicians in your region
- Patient testimonials
- Published, peer reviewed journal articles
- Support from a national organization
- Detailed outline of budgetary requirements to implement OSG
- None of the above
- Other:  

---

**8. Please identify the reasons for why OSGs are not / may not be right for your region. Check all that apply**

- Not applicable
- Budgetary Restrictions
- Costing implications of operating OSG are not clear
- Uncertainty with funding a service that crosses provincial jurisdictions
- Issues with professional accreditation across provincial jurisdictions
- Limited professional capacity to follow through
- Not convinced that patients would use it
  - Population has a wariness of support groups
  - Population has a wariness of online format
- Uncertainty regarding patient privacy and data security
- Uncertainty regarding effectiveness of OSG
- Other:  

---

**9. In your opinion, would any of the following strategies be useful in tackling these barriers? Check all that apply**

- Short research brief summarizing findings into policy and program relevant messages (1 page)
- Face to face presentation and discussion by the OSG research team to decision makers

- Face to face presentation and discussion by clinicians who have implemented OSG in their region with clinicians in your region
- Patient testimonials
- Published, peer reviewed journal articles
- Detailed outline of budgetary requirements to implement OSG
- None of the above
- Other: \_\_\_\_\_
